# Supplementary material for: Genome-Based Analysis Reveals the Taxonomy and Diversity of the Family Idiomarinaceae
Source: Front Microbiol. 2018 Oct 11;9:2453. doi: 10.3389/fmicb.2018.02453 (PMC6193092; doi:10.3389/fmicb.2018.02453)
Supplement: TABLE S1 — The detailed information of 92 Idiomarinaceae genomes used in this study. [file Table_1.xlsx]

## Sheet: Table S1
Table S1 The detailed information of 92 Idiomarinaceae genomes used in this study.
Genome original name	Taxon	Proposed species name	Genome accession	Genomic sizes (bp)	Estimated genomic sizes (bp)	Completeness	Contamination	Strain origin
Idiomarina abyssalis UBA4213	I-1	Idiomarina abyssalis	DFTL00000000	2683750	2.70185e+06	99.33	0.34	The GenBank database
Idiomarina sp. CNP8	I-1	Idiomarina abyssalis	PBST00000000	2606639	2.69783e+06	96.62	1.08	The GenBank database
Idiomarina abyssalis UBA3602	I-1	Idiomarina abyssalis	DFMD00000000	2693750	2.86265e+06	94.1	0.76	The GenBank database
Idiomarina abyssalis UBA5050	I-1	Idiomarina abyssalis	DIBO00000000	2700975	3.01448e+06	89.6	1.18	The GenBank database
Idiomarina abyssalis KMM 227T	I-1	Idiomarina abyssalis	FPBE00000000	2675401	2675401	100	0.28	The GenBank database
Idiomarina sp. SAT134	I-1	Idiomarina abyssalis	PAWS00000000	2301866	2.58404e+06	89.08	4	The GenBank database
Idiomarina abyssalis UBA3100	I-1	Idiomarina abyssalis	DFAS00000000	2655499	2.82861e+06	93.88	0.71	The GenBank database
Idiomarina sp. SP350	I-1	Idiomarina abyssalis	PBDK00000000	2653514	2.65936e+06	99.78	0.17	The GenBank database
Idiomarina abyssalis UBA2690	I-1	Idiomarina abyssalis	DELS00000000	2635346	2.65633e+06	99.21	0.17	The GenBank database
Idiomarina sp. CPC33	I-1	Idiomarina abyssalis	NYUW00000000	2058035	2.504e+06	82.19	1	The GenBank database
Idiomarina sp. UBA4206	I-1	Idiomarina abyssalis	DFTS00000000	2769719	3.10228e+06	89.28	1.73	The GenBank database
Idiomarina abyssalis UBA5042	I-1	Idiomarina abyssalis	DIBW00000000	2757841	2.79785e+06	98.57	0	The GenBank database
Idiomarina abyssalis UBA3616	I-1	Idiomarina abyssalis	DFLP00000000	2721941	2.91928e+06	93.24	0.42	The GenBank database
Idiomarina abyssalis UBA3366	I-1	Idiomarina abyssalis	DEQM00000000	2767288	2.87989e+06	96.09	0.17	The GenBank database
Idiomarina sp. EAC55	I-1	Idiomarina abyssalis	NZQS00000000	2890195	2.89251e+06	99.92	0.56	The GenBank database
Idiomarina sp. SP93	I-1	Idiomarina abyssalis	PAYT00000000	2739896	2.78671e+06	98.32	0	The GenBank database
Idiomarina abyssalis UBA1461	I-1	Idiomarina abyssalis	DCSR00000000	2804935	2.86569e+06	97.88	1.01	The GenBank database
Idiomarina ramblicola R22T	I-2	Idiomarina ramblicola	PIQC00000000	2712866	2712866	100	0	DSM-16140T
Idiomarina sp. UBA1919	I-3	Idiomarina loihiensis	DDFV00000000	2956769	3.21598e+06	91.94	0.28	The GenBank database
Idiomarina sp. UBA3992	I-3	Idiomarina loihiensis	DGBY00000000	2968761	3.13061e+06	94.83	0.78	The GenBank database
Idiomarina sp. UBA3176	I-3	Idiomarina loihiensis	DEXU00000000	2928056	2.94959e+06	99.27	0.45	The GenBank database
Idiomarina sp. UBA4211	I-3	Idiomarina loihiensis	DFTN00000000	2857025	3.26704e+06	87.45	1.1	The GenBank database
Idiomarina sp. CPC80	I-3	Idiomarina loihiensis	NYSZ00000000	2153521	2.3546e+06	91.46	4.18	The GenBank database
Idiomarina loihiensis L2TRT	I-3	Idiomarina loihiensis	AE017340	2839318	2839318	100	0.17	The GenBank database
Idiomarina loihiensis GSL 199	I-3	Idiomarina loihiensis	CP005964	2839759	2839759	100	0.17	The GenBank database
Idiomarina sp. NORP114	I-3	Idiomarina loihiensis	NVTN00000000	2146933	2.76702e+06	77.59	0	The GenBank database
Idiomarina loihiensis H2.2	I-4	Idiomarina genospecies 4	QGUA00000000	2996587	2996587	100	0.56	The GenBank database
Idiomarina sp. 28-8	I-5	Idiomarina genospecies 5	BANL00000000	2974141	2974141	100	1.01	The GenBank database
Idiomarina sp. UBA4520	I-6	Idiomarina genospecies 6	DGMK00000000	2474619	2.56092e+06	96.63	0.34	The GenBank database
Idiomarina sp. UBA4519	I-6	Idiomarina genospecies 6	DGML00000000	2514177	2.87729e+06	87.38	1.17	The GenBank database
Idiomarina sp. REDSEA-S27_B4	I-6	Idiomarina genospecies 6	LUNZ00000000	2257151	2.58255e+06	87.4	0.34	The GenBank database
Idiomarina sp. REDSEA-S21_B4	I-6	Idiomarina genospecies 6	LUNZ00000000	2257151	2.58255e+06	87.4	0.34	The GenBank database
Idiomarina zobellii KMM 231T	I-7	Idiomarina zobellii	FNCB00000000	2582063	2.59087e+06	99.66	0.34	The GenBank database
Idiomarina sp. UBA5185	I-8	Idiomarina genospecies 8	DHWJ00000000	2369871	2.642e+06	89.7	4.98	The GenBank database
Idiomarina piscisalsi TPS4-2T	I-9	Idiomarina piscisalsi	PIQA00000000	2576487	2.58528e+06	99.66	0.34	Private gift from Dr. Somboon Tanasupawat, Chulalongkorn University, Thailand
Idiomarina sp. X4	I-10	Idiomarina genospecies 10	CP025000	2616716	2616716	100	0.51	The GenBank database
Idiomarina piscisalsi 10PY1A	I-11	Idiomarina genospecies 11	CP022133	2587498	2587498	100	1.35	The GenBank database
Idiomarina sp. T82-3	I-12	Idiomarina baltica	LSBQ00000000	2723656	2723656	100	0	The GenBank database
Idiomarina baltica UBA859	I-12	Idiomarina baltica	DBGH00000000	2398722	2.63335e+06	91.09	0.71	The GenBank database
Idiomarina baltica OS145T	I-12	Idiomarina baltica	AAMX00000000	2722127	2.76949e+06	98.29	0.12	The GenBank database
Idiomarina sp. UBA3162	I-13	Idiomarina genospecies 13	DEYI00000000	2603006	2.72995e+06	95.35	0.93	The GenBank database
Idiomarina sp. MD25a	I-14	Idiomarina genospecies 14	MDGT00000000	2680246	2680246	100	0.21	The GenBank database
Idiomarina fontislapidosi F23T	I-15	Idiomarina fontislapidosi	PIPV00000000	2875403	2875403	100	0.09	DSM-16139T
Idiomarina sp. OT37-5b	I-16	Idiomarina aquatica	CP027188	2893517	2893517	100	0.17	The GenBank database
Idiomarina aquatica SN-14T	I-16	Idiomarina aquatica	PIPS00000000	2971124	2.97291e+06	99.94	0.55	Private gift from Dr. Cristina Sánchez-Porro, University of Tehran, Iran
Idiomarina sp. NP27	I-17	Idiomarina genospecies 15	PBYP00000000	3102721	3.67273e+06	84.48	0.86	The GenBank database
Idiomarina seosinensis CL-SP19T	I-18	Idiomarina seosinensis	PIQF00000000	2690852	2.70003e+06	99.66	0.21	KCTC 12296T
Idiomarina tyrosinivorans CC-PW-9T	I-19	Idiomarina tyrosinivorans	PIQH00000000	2431753	2.46503e+06	98.65	0.17	JCM 19757T
Idiomarina xiamenensis 10-D-4T	I-20	Idiomarina xiamenensis	AMRG00000000	2899282	2899282	100	0.17	The GenBank database
Idiomarina sp. NORP21	II-1	Idiomarina marina	NVXC00000000	2343995	2.39281e+06	97.96	0.28	The GenBank database
Idiomarina marina PIM1T	II-1	Idiomarina marina	PIPZ00000000	2416590	2.42483e+06	99.66	0.28	Institute of Oceanography, National Taiwan University
Idiomarina sp. 34-48-12	II-2	Pseudidiomarina genospecies 2	NCJS00000000	2102884	2.29247e+06	91.73	2.73	The GenBank database
Idiomarina tainanensis PIN1T	II-3	Pseudidiomarina tainanensis	PIQJ00000000	2376930	2.38504e+06	99.66	0.28	Institute of Oceanography, National Taiwan University
Idiomarina maritima CGMCC 1.7285T	II-3	Pseudidiomarina tainanensis	FOYU00000000	2436491	2.4448e+06	99.66	0.28	The GenBank database
Idiomarina woesei DSM 27808T	II-4	Pseudidiomarina woesei	LIPW00000000	2437751	2.45419e+06	99.33	0.28	The GenBank database
Idiomarina donghaiensis 908033T	II-5	Pseudidiomarina donghaiensis	PIPU00000000	2578865	2.58766e+06	99.66	0.3	Zhejiang University, China
Idiomarina indica CGMCC 1.10824T	II-6	Pseudidiomarina indica	FMXN00000000	2206361	2.2468e+06	98.2	0.59	The GenBank database
Idiomarina maritima 125B1	II-7	Pseudidiomarina genospecies 7	QGTT00000000	2774828	2.78429e+06	99.66	0.28	The GenBank database
Idiomarina sp. UBA6142	II-8	Pseudidiomarina genospecies 8	DIVC00000000	1820243	2.16954e+06	83.9	0.26	The GenBank database
Idiomarina salinarum ISL-52T	II-9	Pseudidiomarina salinarum	PIQD00000000	2490025	2.50279e+06	99.49	0.73	KCTC 12971T
Idiomarina homiensis PO-M2T	II-10	Pseudidiomarina homiensis	PIPX00000000	2612526	2.62144e+06	99.66	0.2	KACC 11514T
Idiomarina aquimaris SW15T	II-11	Pseudidiomarina aquimaris	PIPT00000000	2804599	2.85252e+06	98.32	0.3	LMG 25374T
Idiomarina insulisalsae CVS-6T	II-12	Pseudidiomarina insulisalsae	PIPY00000000	2566472	2.59266e+06	98.99	0.22	LMG 23123T
Idiomarina sediminum c121T	II-13	Pseudidiomarina sediminum	PIQE00000000	2628273	2.67318e+06	98.32	0.17	CICC 10319T
Idiomarina halophila BH195T	II-14	Pseudidiomarina halophila	PIPW00000000	2622922	2.66774e+06	98.32	0.06	KACC 17610T
Idiomarina atlantica G5_TVMV8_7T	II-15	Pseudidiomarina atlantica	JPIN00000000	2703110	2.7493e+06	98.32	0.28	The GenBank database
Idiomarina taiwanensis PIT1T	II-16	Pseudidiomarina taiwanensis	PIQG00000000	2201302	2.24531e+06	98.04	0	Institute of Oceanography, National Taiwan University
Idiomarina aestuarii KYW314T	II-17	Pseudidiomarina aestuarii	PIPR00000000	2646284	2.65531e+06	99.66	0.11	JCM 16344T
Idiomarina planktonica TS-T11T	II-18	Pseudidiomarina planktonica	PIQB00000000	2580633	2.58503e+06	99.83	0.42	CGMCC 1.12458T
Idiomarina sp. A28L	III-1	Aliidiomarina genospecies 1	AFPO00000000	2591567	2.62092e+06	98.88	0.51	The GenBank database
Aliidiomarina shirensis AIST	III-2	Aliidiomarina shirensis	PIPP00000000	2710136	2.74083e+06	98.88	0.52	JCM 17761T
Aliidiomarina iranensis GBPy7T	III-3	Aliidiomarina iranensis	PIPJ00000000	2650619	2.68064e+06	98.88	0.17	IBRC-M 10763T
Aliidiomarina haloalkalitolerans AK5T	III-4	Aliidiomarina haloalkalitolerans	PIPI00000000	2675932	2.70926e+06	98.77	0.17	IBRC-M 11067T
Aliidiomarina sanyensis GYP-17T	III-5	Aliidiomarina sanyensis	PIPM00000000	2597337	2.62676e+06	98.88	0.9	KCTC 32218T
Aliidiomarina taiwanensis AIT1T	III-6	Aliidiomarina taiwanensis	PIPQ00000000	2534986	2.5936e+06	97.74	1.09	Institute of Oceanography, National Taiwan University
Aliidiomarina soli Y4G10-17T	III-7	Aliidiomarina soli	PIPO00000000	3104575	3.13467e+06	99.04	0.51	Private gift from Dr. Xiaolei Wu, Peking University, China
Aliidiomarina sedimenti GBSy1T	III-8	Aliidiomarina sedimenti	PIPN00000000	2854851	2.88515e+06	98.95	1.18	IBRC-M 10764T
Aliidiomarina maris CF12-14T	III-9	Aliidiomarina maris	PIPK00000000	3021717	3.04916e+06	99.1	0.64	MCCC 1A06433T
Aliidiomarina minuta MLST1T	III-10	Aliidiomarina minuta	PIPL00000000	2957590	2.98114e+06	99.21	0.42	JCM 17425T
Idiomarina sp. IN36*	I-1	Idiomarina abyssalis	NZLL00000000	-	-	68.47	0.86
Idiomarina abyssalis UBA2697*	I-1	Idiomarina abyssalis	DELL00000000	-	-	85.09	1.82
Idiomarina sp. UBA1482*	I-1	Idiomarina abyssalis	DCRW00000000	-	-	65.52	0
Idiomarina sp. UBA1478*	I-8	Idiomarina genospecies 8	DCSA00000000	-	-	73.5	1.13
Idiomarina sp. NP44*	I-12	Idiomarina baltica	PBUE00000000	-	-	71.87	1.5
Idiomarina sp. NORP144*	I-17	Idiomarina genospecies 15	NVSJ00000000	-	-	66.43	1.68
Idiomarina sp. UBA6937*	II-11	Pseudidiomarina aquimaris	DKAB00000000	-	-	71.15	1.88
Idiomarina aestuarii Z-E1-2*	II-19	Pseudidiomarina genospecies 19	PYVS00000000	-	-	28.37	0
Idiomarina aestuarii A12-4*	II-19	Pseudidiomarina genospecies 19	PYVF00000000	-	-	27.69	0.67
Idiomarina aestuarii Z-E7-4*	II-19	Pseudidiomarina genospecies 19	PYVR00000000	-	-	33.34	0.04
Idiomarina aestuarii Z-D7-3*	II-19	Pseudidiomarina genospecies 19	PYVM00000000	-	-	16.31	1.36
Idiomarina aestuarii Z-D3-2*	II-19	Pseudidiomarina genospecies 19	PYVN00000000	-	-	31.95	2.46
Idiomarina aestuarii A9-4*	II-19	Pseudidiomarina genospecies 19	PYVG00000000	-	-	52.63	0.52
Notes:
1. I, Idiomarina; II, Pseudidiomarina; III, Aliidiomarina.
2. The 13 putative new genospecies are shown in bold.
3. Each of type strains are marked by a superscripted capital T.
4. Estimated genomic size of a bacterium (bp)=sequencing genomic size (bp)/completeness (%).
5. These strain marked by sterisks are used for analyzing their taxonomic status.
