# Supplementary material for: Genome-Based Analysis Reveals the Taxonomy and Diversity of the Family Idiomarinaceae
Source: Front Microbiol. 2018 Oct 11;9:2453. doi: 10.3389/fmicb.2018.02453 (PMC6193092; doi:10.3389/fmicb.2018.02453)
Supplement: TABLE S7 — The pairwise dDDH values (%) between the representative strains and the other thirteen strains marked by asterisks. [file Table_7.xlsx]

## Sheet: Table SXX
Table S7 The pairwise dDDH values (%) between the representative strains and the other thirteen strains marked by sterisks
	Taxon	I-1	I-1	I-1	I-8	I-12	I-17	II-11	II-19	II-19	II-19	II-19	II-19	II-19
Representative strains	(%)	Idiomarina sp. IN36*	Idiomarina abyssalis UBA2697*	Idiomarina sp. UBA1482*	Idiomarina sp. UBA1478*	Idiomarina sp. NP44*	Idiomarina sp. NORP144*	Idiomarina sp. UBA6937*	Idiomarina aestuarii Z-E1-2*	Idiomarina aestuarii A12-4*	Idiomarina aestuarii Z-E7-4*	Idiomarina aestuarii Z-D7-3*	Idiomarina aestuarii Z-D3-2*	Idiomarina aestuarii A9-4*
Idiomarina abyssalis KMM 227T	I-1	76.3	75.3	79.2	21.4	17.8	18.7	21.1	26.4	20.8	27.2	19.7	30.4	23.1
Idiomarina ramblicola R22T	I-2	27.6	27.5	27.2	19.8	17	18.6	20.7	22.8	19	22	20.6	22.9	19.1
Idiomarina loihiensis L2TRT	I-3	25.3	25.7	24.8	20.7	17.2	18.8	19.5	33	25.4	33.2	22.5	35	23.8
Idiomarina loihiensis H2.2	I-4	25.7	25.7	24.9	20.3	16.9	18.8	19.4	32	22.7	32.6	20.8	25.7	22.3
Idiomarina sp. 28-8	I-5	25.5	25.8	24.9	20.6	17.2	18.9	19.5	39	23.2	33.7	24.5	31.4	23.9
Idiomarina sp. UBA4519	I-6	21.2	21.3	22	74.5	18.7	20.3	22.6	20.1	20.5	30.5	22.1	26.2	23.3
Idiomarina zobellii KMM 231T	I-7	20.2	20.4	19.7	70.8	18.3	20.3	21	22.2	19.8	24.2	19.8	28.5	22.5
Idiomarina sp. UBA5185	I-8	20.7	20.3	20.1	78.8	23.3	19.3	24	17.9	18	18.8	18.5	16.8	18.1
Idiomarina piscisalsi TPS4-2T	I-9	20	19.9	19.4	55.6	17.1	19.8	20.3	17.9	17.4	19.6	21	23.1	19.4
Idiomarina sp. X4	I-10	19.9	19.9	19.6	30.9	17.3	19.5	21.2	27.1	21.2	25.1	24	29.5	22.4
Idiomarina piscisalsi 10PY1A	I-11	20	19.6	19.6	31.3	17	19.1	20.1	23.3	19	20.6	23.9	27.6	20.6
Idiomarina baltica OS145T	I-12	19.1	21	18.2	22.6	85.7	18.6	19.9	30.1	23.7	37.9	22	30.3	24.4
Idiomarina sp. UBA3162	I-13	17.8	20	17.6	20.6	32.2	17.1	16.3	18	15.6	25.6	17	18.3	19.7
Idiomarina sp. MD25a	I-14	19.1	19.6	17.4	21.1	31.9	17.3	18.9	22.5	18.8	30.4	20.4	31.8	20.8
Idiomarina fontislapidosi F23T	I-15	18.1	17.6	17.2	19	22.1	17.9	19.4	22	19.3	21.8	21.6	25.1	20.7
Idiomarina sp. OT37-5b	I-16	19.9	21.1	17.7	22.1	17.9	19.1	20.9	30	23.8	39.1	22.8	33.6	24
Idiomarina aquatica SN-14T	I-16	18.9	19.8	17.8	21.6	17.7	19	20.1	30.4	21.2	33.8	20.7	31.4	21.6
Idiomarina sp. NP27	I-17	19.2	20	19.5	23	16.5	86.5	21.4	16.5	17.8	20.2	17.1	24.6	18.4
Idiomarina seosinensis CL-SP19T	I-18	18.8	19.8	17.6	22.7	17.2	17.7	20	25.5	21.8	31	22	27.9	22.9
Idiomarina tyrosinivorans CC-PW-9T	I-19	17.2	17.6	16.6	18.8	18.1	17.8	19.4	21.4	19.8	21.8	21.7	21.7	20
Idiomarina xiamenensis 10-D-4T	I-20	18.4	18.1	17.7	20.1	19.4	18	19.5	21.1	20.2	26.3	20.7	26.2	20.3
Idiomarina sp. NORP21	II-1	18.3	22.6	17.5	24.5	18.7	20.6	20.3	20.3	20.9	23.7	24	21.8	19.7
Idiomarina marina PIM1T	II-1	18.4	20.3	17.3	21.4	18.2	20	19.7	21.7	21.3	23.8	24.6	24.4	19.7
Idiomarina sp. 34-48-12	II-2	18.6	21.9	17.2	23.1	18.9	20.2	20.4	20.1	21.9	25.5	21.4	22.5	21.1
Idiomarina tainanensis PIN1T	II-3	19.3	20.6	17.5	21.4	19.3	18.1	20.5	21.4	21.8	21.9	24.3	25.8	20.5
Idiomarina maritima CGMCC 1.7285T	II-3	19.8	23.7	18.1	23.3	18.9	17.7	20.2	20.9	21.6	23.1	23.1	24.8	20.4
Idiomarina woesei DSM 27808T	II-4	18.1	20.8	17.9	21.4	18.1	18.9	19.4	20.9	21.1	23.4	23.6	24.2	20.8
Idiomarina donghaiensis 908033T	II-5	19.3	22.9	17.8	23.6	17.8	18.9	19.7	21.4	22	25.6	25.2	26.2	21.5
Idiomarina indica CGMCC 1.10824T	II-6	17.8	18.6	17.6	17.9	16.8	17.6	19.2	20.2	19.9	21.2	25.2	21.6	18.9
Idiomarina maritima 125B1	II-7	18.4	28.1	17	22.5	19.9	18.5	20.4	24.9	22.6	25.9	24.8	25.5	23.7
Idiomarina sp. UBA6142	II-8	18	17.9	17	16.9	20.2	17.2	18.6	19.8	19.6	17.5	22.6	17.5	18.1
Idiomarina salinarum ISL-52T	II-9	18.2	17.8	17.2	18.4	17.5	17.5	19.1	21.8	19.2	19.9	24.5	22.8	18.6
Idiomarina homiensis PO-M2T	II-10	19.4	27.1	17.8	23.1	17.8	20.5	22.4	22.4	23.1	26.3	25.5	29.1	22.6
Idiomarina aquimaris SW15T	II-11	20.2	22.8	18.6	23.9	17.6	19.9	73.3	24.3	22.8	25.5	26.8	26.2	21.9
Idiomarina insulisalsae CVS-6T	II-12	19.1	17.9	17.1	18.4	17.2	18.7	19.3	20.9	20.4	20	22.8	25.9	19.9
Idiomarina sediminum c121T	II-13	19.3	18.1	17.1	17.6	17.1	19.3	18.7	19.7	19.8	19.6	26.2	20.6	19.8
Idiomarina halophila BH195T	II-14	18.6	23.1	18.1	20.3	17.5	18.6	18.4	20.3	20.6	21.6	22	22.6	19.5
Idiomarina atlantica G5_TVMV8_7T	II-15	20	24.7	17.5	23.7	17.9	20	18.8	24.3	23.4	24.7	22.4	29.7	20.9
Idiomarina taiwanensis PIT1T	II-16	18	17.9	17.7	18.6	17.6	17.4	19.1	21.1	20.8	21.7	23.2	23.2	20.1
Idiomarina aestuarii KYW314T	II-17	19.2	17.8	17.8	18.8	17.3	19.2	19.7	33.9	33.9	34.5	37	35.9	35
Idiomarina planktonica TS-T11T	II-18	19.1	18.8	18	17.7	17.9	17.6	20.3	19.8	19.1	21.4	21.9	26.7	20.1
Idiomarina sp. A28L	III-1	19.6	19.6	18.3	19.2	17.8	19.9	20.1	26.1	22.7	25	23.6	30	21
Aliidiomarina shirensis AIST	III-2	18.6	18.6	17.7	21.3	17.4	19.7	20.1	28.3	24	27	24.1	28.6	23.2
Aliidiomarina iranensis GBPy7T	III-3	19.2	20.3	20	19.3	16.8	18.8	20.6	31	21.8	25	22.4	25.4	21
Aliidiomarina haloalkalitolerans AK5T	III-4	18.4	18.4	19.4	18.3	18.9	19.1	20.8	25	23.1	23.4	22.9	30	21.5
Aliidiomarina sanyensis GYP-17T	III-5	18	16.8	16.4	19.3	17.8	17.8	20.8	26.9	20.5	28.3	22.7	29.3	20.9
Aliidiomarina taiwanensis AIT1T	III-6	18.4	19.1	16.9	18.4	17.7	19.7	18	19	19.2	21.6	20.7	32.1	19.1
Aliidiomarina soli Y4G10-17T	III-7	18.1	17.7	17.1	18.2	17.1	17.9	20.1	21.2	19.4	21.5	22.2	26	20.1
Aliidiomarina sedimenti GBSy1T	III-8	18.1	17.3	16.6	17.9	17.2	17.4	19.7	21.2	19.5	21.7	23.1	27.6	20.5
Aliidiomarina maris CF12-14T	III-9	18.6	18.2	17.4	21.3	18.4	19.5	19.5	22.6	21.1	25.2	23.3	28	21.3
Aliidiomarina minuta MLST1T	III-10	18.4	17.8	16.5	18	17	17.5	20.3	21.9	20.2	21.1	22.5	28.9	20.6
Idiomarina sp. IN36*	I-1	100	82.8	84.8	21.3	18.1	18.5	19.5	17.7	16.8	21.1	16.4	17.4	18.5
Idiomarina abyssalis UBA2697*	I-1	82.8	100	86	21.5	17.5	19	19.9	32.3	23.9	28.6	18.8	17.4	22.3
Idiomarina sp. UBA1482*	I-1	84.8	86	100	20.5	16.7	18.1	17.7	16.7	16.4	16.6	18.6	17.9	17.5
Idiomarina sp. UBA1478*	I-8	21.3	21.5	20.5	100	18.8	21.7	23.6	18.5	17.4	30.3	19.7	29.2	20.6
Idiomarina sp. NP44*	I-12	18.1	17.5	16.7	18.8	100	16.9	17	15.9	15.6	22.1	17	29.5	18.4
Idiomarina sp. NORP144*	I-17	18.5	19	18.1	21.7	16.9	100	22.9	18.5	18.7	19.1	26.1	26.2	19.9
Idiomarina sp. UBA6937*	II-11	19.5	19.9	17.7	23.6	17	22.9	100	21.9	21.3	20.9	24.3	20.7	20.6
Idiomarina aestuarii Z-E1-2*	II-19	17.7	32.3	16.7	18.5	15.9	18.5	21.9	100	98.5	98.8	82.6	89.5	99.2
Idiomarina aestuarii A12-4*	II-19	16.8	23.9	16.4	17.4	15.6	18.7	21.3	98.5	100	99.3	96.1	97.2	99.6
Idiomarina aestuarii Z-E7-4*	II-19	21.1	28.6	16.6	30.3	22.1	19.1	20.9	98.8	99.3	100	93.2	97.7	99.6
Idiomarina aestuarii Z-D7-3*	II-19	16.4	18.8	18.6	19.7	17	26.1	24.3	82.6	96.1	93.2	100	80.7	97.2
Idiomarina aestuarii Z-D3-2*	II-19	17.4	17.4	17.9	29.2	29.5	26.2	20.7	89.5	97.2	97.7	80.7	100	98.2
Idiomarina aestuarii A9-4*	II-19	18.5	22.3	17.5	20.6	18.4	19.9	20.6	99.2	99.6	99.6	97.2	98.2	100
Note:
1. I, Idiomarina; II, Pseudidiomarina; III, Aliidiomarina.
2. The putative new genospecies are shown in bold.
3. Each of type strains are marked by a superscripted capital T.
4. The cells with larger than 70% of dDDH are filled with the yellow.
5. These strain marked by sterisks are used for analyzing their taxonomic status.
